# Supplementary material for: A pilot study of the use of dynamic analysis of cell-free DNA from aqueous humor and vitreous fluid for the diagnosis and treatment monitoring of vitreoretinal lymphomas
Source: PubMed Central journal article supplement — Haematologica. 2022 Feb 10;107(9):2154–62. doi: 10.3324/haematol.2021.279908 (PMC9425330; doi:10.3324/haematol.2021.279908), 2022-02-10
Supplement: 2021_279908_WANG_SUPPL.pdf [file 2021_279908_WANG_SUPPL.pdf]

# A pilot study of the use of dynamic analysis of cell-free DNA from aqueous humor and vitreous fluid for the diagnosis and treatment monitoring of vitreoretinal lymphomas

Xiaoxiao Wang,<sup>1,2\*</sup> Wenru Su,<sup>3\*</sup> Yan Gao,<sup>1,2\*</sup> Yanfen Feng,<sup>1,4</sup> Xiaoxia Wang,<sup>5</sup> Xiaoqing Chen,<sup>3</sup> Yunwei Hu,<sup>3</sup> Yutong Ma,<sup>5</sup> Qiuxiang Ou,<sup>5</sup> Dan Liang<sup>3</sup> and Huiqiang Huang<sup>1,2</sup>

<sup>1</sup>State Key Laboratory of Oncology in South China, Collaborative Innovation Center for Cancer Medicine, Guangzhou; <sup>2</sup>Department of Medical Oncology, Sun Yat-sen University Cancer Center, Guangzhou; <sup>3</sup>State Key Laboratory of Ophthalmology, Zhongshan Ophthalmic Center, Sun Yat-sen University, Guangzhou; <sup>4</sup>Department of Pathology, Sun Yat-sen University Cancer Center, Guangzhou and <sup>5</sup>Geneseeq Research Institute, Nanjing Geneseeq Technology Inc., Nanjing, Jiangsu, China

*\*XW, WS and YG contributed equally as co-first authors.*

**Correspondence:** H. Huang  
[huanghq@sysucc.org.cn](mailto:huanghq@sysucc.org.cn)

D. Liang  
[liangdan@gzzoc.com](mailto:liangdan@gzzoc.com)

**Received:** September 7, 2021.

**Accepted:** February 2, 2022.

**Prepublished:** February 10, 2022.

<https://doi.org/10.3324/haematol.2021.279908>

©2022 Ferrata Storti Foundation

Published under a CC BY-NC license

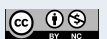

## Supplementary Data

### **A pilot study of the use of dynamic cfDNA from aqueous humor and vitreous fluid for the diagnosis and treatment monitoring of vitreoretinal lymphomas**

**Authors:** Xiaoxiao Wang,<sup>1,2,\*</sup> Wenru Su,<sup>3,\*</sup> Yan Gao,<sup>1,2,\*</sup> Yanfen Feng,<sup>1,4</sup> Xiaoxia Wang,<sup>5</sup> Xiaoqing Chen,<sup>3</sup> Yunwei Hu,<sup>3</sup> Yutong Ma,<sup>5</sup> Qiuxiang Ou,<sup>5</sup> Dan Liang,<sup>3,#</sup> Huiqiang Huang<sup>1,2,#</sup>

\* These authors contributed equally; # Co-corresponding authors

#### **Affiliations:**

1. State Key Laboratory of Oncology in South China, Collaborative Innovation Center for Cancer Medicine, Guangzhou, China
2. Department of Medical Oncology, Sun Yat-sen University Cancer Center, Guangzhou, China
3. State Key Laboratory of Ophthalmology, Zhongshan Ophthalmic Center, Sun Yat-sen University, Guangzhou, China
4. Department of Pathology, Sun Yat-sen University Cancer Center, Guangzhou, China
5. Geneseeq Research Institute, Nanjing Geneseeq Technology Inc., Nanjing, Jiangsu, China

## Supplementary material and methods

### *Cytology, IHC, and IGH clonality analyses*

Cytological evaluations of undiluted VF samples were performed using May-Grünwald-Giemsa staining. IHC staining for CD20 (L26, Ascend BIO, Guangzhou, China, 1:100) and CD3 (SP1, Dako, Glostrup, Denmark, 1:250) was performed using automated staining (Ventana Medical Systems, Tucson, AZ), according to the manufacturer's protocol.

Genomic DNA was extracted and purified from 200  $\mu$ L of VF using the TIANGEN DNA Mini kit DP316, according to the manufacturer's instructions. DNA concentration and quality were analyzed using a Qubit 3.0 Fluorometer (Life Technologies, Carlsbad, CA) following manufacturer's instructions and agarose gel electrophoresis, respectively. IGH gene rearrangements were detected using PCR, as previously described, with the consensus primers, BIOMED-2 FR3 and FR2.<sup>1</sup>

### *Interleukin measurements*

The IL-6 and IL-10 levels in AH/VF samples were measured using Becton Dickinson bead-based Cytometric Bead Arrays (Human IL-6 Flex Set, No.558276, BD Bioscience, San Jose, CA, Human IL-10 Flex Set, No.558274, BD Bioscience, San Jose, CA), following the manufacturer's instructions. IL-6 and IL-10 concentrations in the AH samples from patients and controls were determined using standard curves.

### *Statistics*

Mutation allele frequency comparisons between paired AH/VF/CSF samples were calculated using the t-test (two-sided) and labeled as follows: \*,  $p < 0.1$ ; \*\*,  $p < 0.05$ ; \*\*\*,  $p <$

0.01. Mutational frequency comparisons between VRL and PCNSL patients were analyzed using the Fisher's exact test. A p-value of less than 0.05 was considered statistically significant.

## **References**

1. van Dongen JJ, Langerak AW, Bruggemann M, et al. Design and standardization of PCR primers and protocols for detection of clonal immunoglobulin and T-cell receptor gene recombinations in suspect lymphoproliferations: report of the BIOMED-2 Concerted Action BMH4-CT98-3936. *Leukemia*. 2003;17(12):2257-2317.

## **Supplementary Figures**

### *List of supplementary figures*

Figure S1. Cytologic and immunohistochemistry (IHC) images of a representative VRL patient (V4)

Figure S2. Mutational comparisons between paired left and right AH samples in patient V5

Figure S3. Concurrent mutations in baseline samples from VRL and PCNSL patients

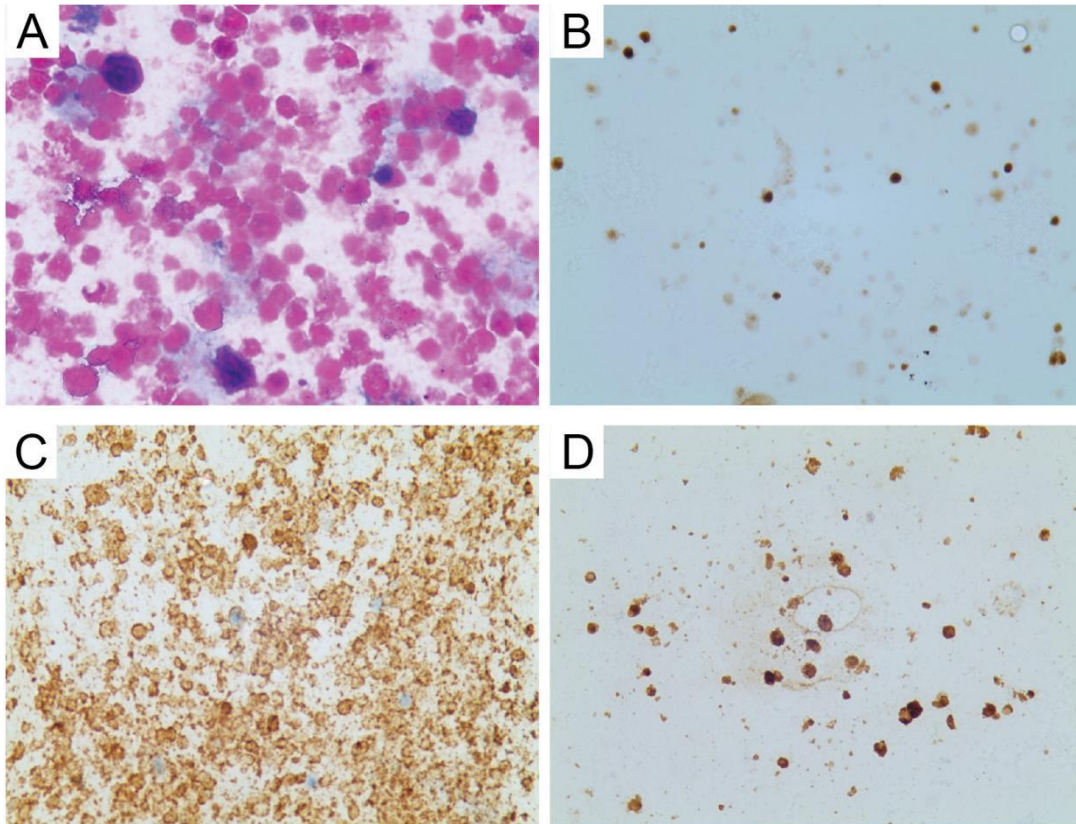

**Figure S1. Cytologic and immunohistochemistry (IHC) images of a representative VRL patient (V4)**

(A) The May-Grünwald-Giemsa staining (400x magnification) shows a hypercellular aspirate with large atypical cells and small lymphocytes. Atypical cells had a moderate to abundant basophilic cytoplasm, round to ovary nuclei, inconspicuous nucleoli, and condensed chromatin. IHC showed that the large atypical cells were positive for (B) Ki67, (C) CD20, and (D) CD79a (400x magnification).

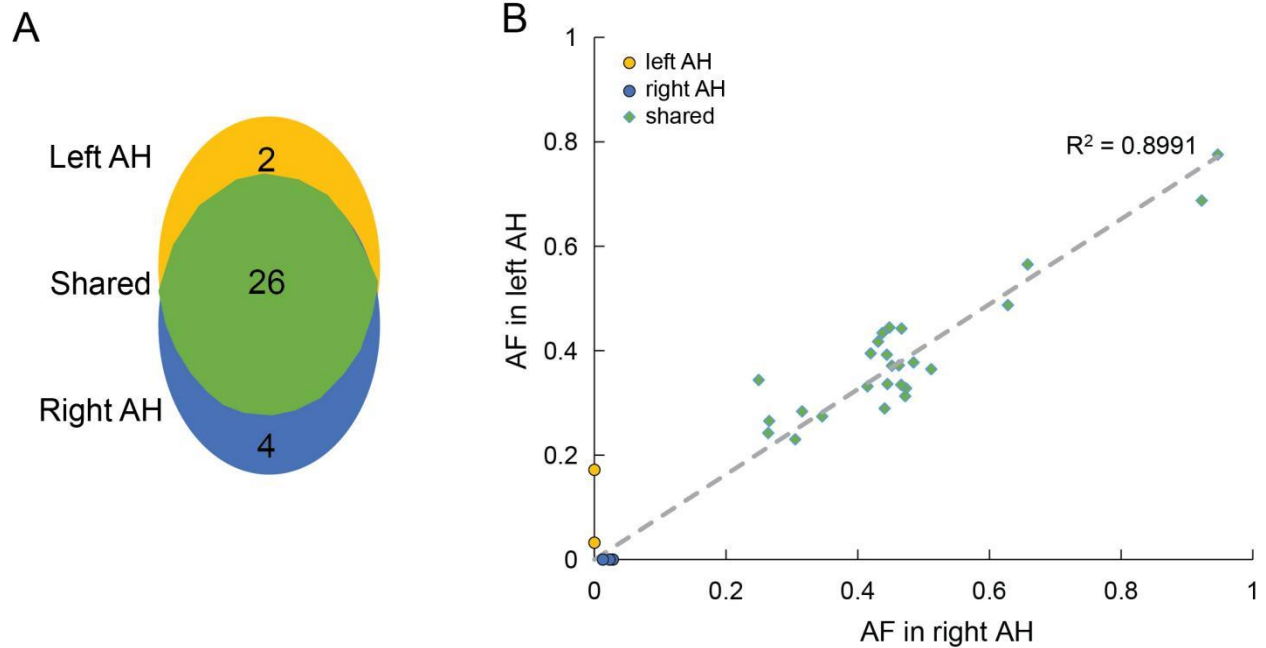

**Figure S2. Mutational comparisons between paired left and right AH samples in patient V5**

(A) The number of alterations detected in both or only in the left or right AH samples from patient V5. (B) The AFs of mutations in matched left and right AH samples are shown by the dot plot. Shared mutations are represented by green squares and mutations detected only in the left or right AH samples are represented by yellow and blue circles, respectively. AH: aqueous humor; AF: allele frequency

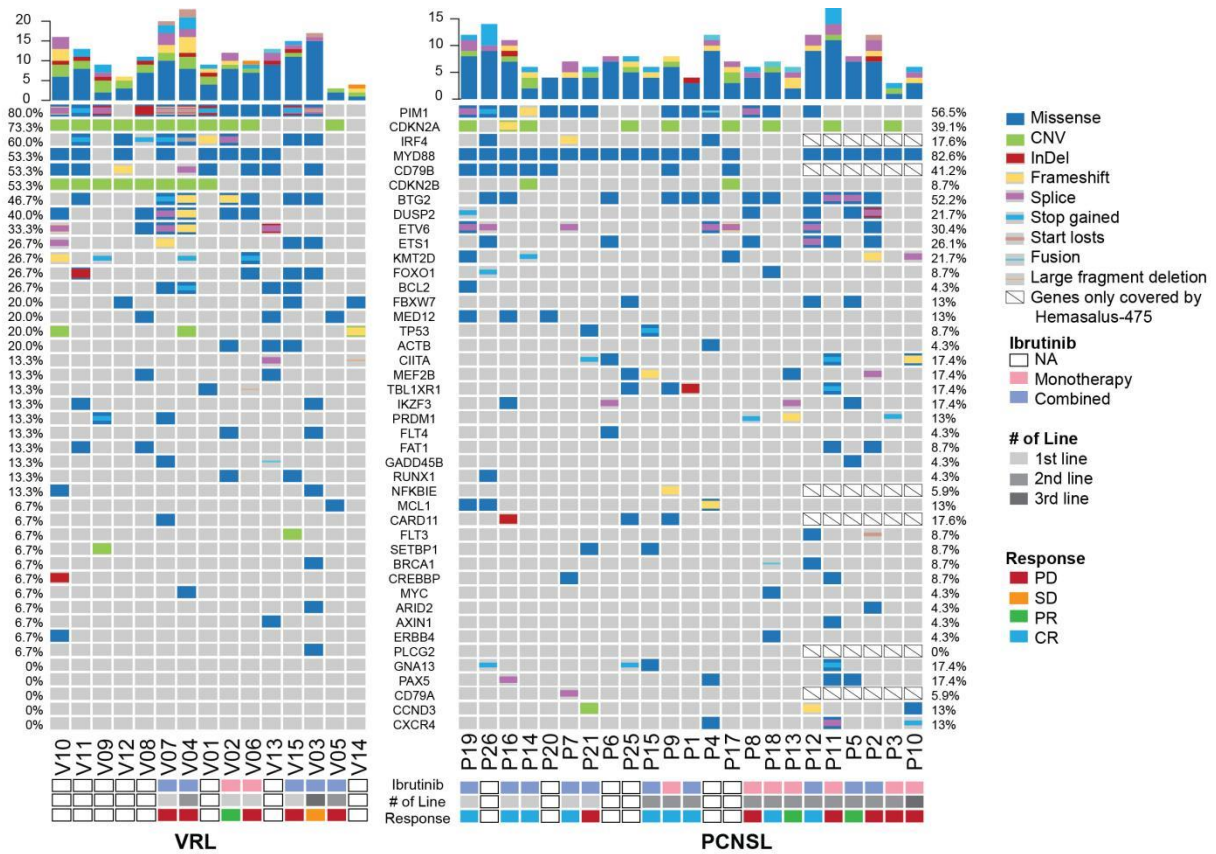

**Figure S3. Concurrent mutations in baseline samples from VRL and PCNSL patients**

The concurrent mutations in 15 VRL and 23 PCNSL patients are shown in the left and right panels. All mutation types are indicated in the legend. Due to differences in the sequencing panels used, the tissue samples from six PCNSL patients (P2-3, P5, P10-12) were analyzed using a prior version of the sequencing panel, which did not include the genes represented by slashes. VRL: vitreoretinal lymphoma; PCNSL: primary central nervous system lymphoma; PD: progressed disease; SD: stable disease; PR: partial response; CR: complete response; CNV: copy number variant; InDel: Insertion–deletion mutation



## **Supplementary Tables**

### *List of supplementary tables*

Table S1. The list of genes covered in the NGS panel (Hemasalus-425/475)

Table S2. The cfDNA extraction information and the sequencing quality control (QC) data of all liquid biopsy samples in the VRL cohort

Table S3. The complete mutation list of all samples detected by targeted NGS

Table S4. Clinicopathologic data of 15 VRL patients

Table S5. The therapeutic responses of ibrutinib in 17 PCNSL and 7 PVRL cases

\*Table S1-S3 are provided in separated excel files

**Table S4. Clinicopathologic data of 15 VRL patients**

| Patient | Age | Sex | Ibrutinib Treatment   | B-cell clonality | Vitreous opacity | Location             | Subtype                                  | AH Sampling | VF Sampling | CSF ctDNA  |
|---------|-----|-----|-----------------------|------------------|------------------|----------------------|------------------------------------------|-------------|-------------|------------|
| V1      | 58  | M   | NA                    | +                | +++              | Vitreous             | Synchronous VRL and PCNSL                | Baseline    | Baseline    | +          |
| V2      | 45  | F   | 1 <sup>st</sup> -line | NA               | ++               | Vitreous             | Primary VRL                              | Sequential  | Baseline    | Not tested |
| V3      | 51  | M   | 3 <sup>rd</sup> -line | +                | 0~++             | Vitreous             | Primary VRL                              | Sequential  | Baseline    | -          |
| V4      | 52  | F   | 2 <sup>nd</sup> -line | +                | ++               | Vitreous             | Primary VRL                              | Baseline    | Baseline    | Not tested |
| V5      | 64  | F   | 2 <sup>nd</sup> -line | NA               | +                | Subretinal           | Primary VRL (subsequent CNS involvement) | Sequential  | NA          | +          |
| V6      | 56  | M   | 1 <sup>st</sup> -line | NA               | +                | Subretinal           | Primary VRL (subsequent CNS involvement) | NA          | Sequential  | +          |
| V7      | 38  | M   | 1 <sup>st</sup> -line | +                | ++               | Vitreous             | Primary VRL                              | Baseline    | NA          | -          |
| V8      | 63  | F   | NA                    | NA               | +                | Subretinal           | Primary VRL                              | Baseline    | NA          | Not tested |
| V9      | 65  | F   | NA                    | NA               | ++               | Vitreous             | Primary VRL                              | NA          | Baseline    | Not tested |
| V10     | 46  | M   | NA                    | NA               | +~+++            | Vitreous, Subretinal | Synchronous VRL and PCNSL                | NA          | Baseline    | +          |
| V11     | 63  | M   | NA                    | NA               | +++              | Vitreous, Subretinal | Primary VRL                              | Baseline    | NA          | Not tested |
| V12     | 68  | M   | NA                    | NA               | +                | Vitreous, Subretinal | Primary VRL                              | Baseline    | NA          | Not tested |
| V13     | 62  | F   | NA                    | NA               | ++               | Vitreous, Subretinal | Primary VRL                              | NA          | Baseline    | Not tested |
| V14     | 55  | F   | NA                    | NA               | +~++             | Subretinal           | Primary VRL                              | NA          | Baseline    | Not tested |
| V15     | 56  | M   | 1 <sup>st</sup> -line | NA               | +++              | Vitreous             | Primary VRL                              | Sequential  | NA          | +          |

Abbreviation: F (Female); M (Male); NA (not available); + (positive)

**Table S5. The therapeutic responses of ibrutinib in 17 PCNSL and 7 PVRL cases**

| Patient | Subtype | # of Line | <i>MYD88</i> | <i>CD79B</i> | Details                     | Best Response |
|---------|---------|-----------|--------------|--------------|-----------------------------|---------------|
| P12     | PCNSL   | 2nd       | mutant       | NA           | Pembrolizumab+Ibrutinib+TMZ | CR            |
| P18     | PCNSL   | 2nd       | wt           | wt           | Ibrutinib                   | CR            |
| P1      | PCNSL   | 2nd       | mutant       | wt           | Sintilimab+LEN+Ibrutinib    | CR            |
| P15     | PCNSL   | 2nd       | mutant       | wt           | Sintilimab+LEN+Ibrutinib    | CR            |
| P16     | PCNSL   | 1st       | mutant       | mutant       | MIT                         | CR            |
| P9      | PCNSL   | 2nd       | mutant       | mutant       | Ibrutinib                   | CR            |
| P14     | PCNSL   | 1st       | mutant       | mutant       | Rituximab+Ibrutinib+TMZ     | CR            |
| P7      | PCNSL   | 1st       | mutant       | wt           | MIT                         | CR            |
| P19     | PCNSL   | 1st       | mutant       | mutant       | MIT                         | CR            |
| P5      | PCNSL   | 2nd       | mutant       | NA           | Ibrutinib+Pemetrexed        | PR            |
| P13     | PCNSL   | 2nd       | wt           | wt           | Ibrutinib                   | PR            |
| P2      | PCNSL   | 2nd       | mutant       | NA           | Ibrutinib+Pemetrexed        | PD            |
| P11     | PCNSL   | 2nd       | mutant       | NA           | Ibrutinib                   | PD            |
| P3      | PCNSL   | 2nd       | mutant       | NA           | Ibrutinib                   | PD            |
| P8      | PCNSL   | 2nd       | wt           | wt           | Ibrutinib                   | PD            |
| P21     | PCNSL   | 1st       | mutant       | wt           | MIT                         | PD            |
| P10     | PCNSL   | 3rd       | mutant       | NA           | Ibrutinib                   | PD            |
| V2      | VRL     | 1st       | mutant       | wt           | Ibrutinib                   | PR            |
| V3      | VRL     | 3rd       | wt           | mutant       | Toripalimab+Ibrutinib       | SD            |
| V4      | VRL     | 2nd       | wt           | mutant       | Sintilimab+Ibrutinib        | PD            |
| V5      | VRL     | 2nd       | wt           | wt           | Ibrutinib+LEN               | PD            |
| V6      | VRL     | 1st       | mutant       | mutant       | Ibrutinib                   | PD            |
| V7      | VRL     | 1st       | mutant       | wt           | Ibrutinib+LEN               | PD            |
| V15     | VRL     | 1st       | wt           | wt           | Ibrutinib+LEN               | PD            |

Abbreviation: wt: wild-type; NA: not available; LEN: lenalidomide; TMZ: temozolomide; MIT: methotrexate+ibrutinib+temozolomide; CR: complete response; PR: partial response; SD: stable disease; PD: progressed disease
